# Supplementary material for: HLA-G and HLA-E Immune Checkpoints Are Widely Expressed in Ewing Sarcoma but Have Limited Functional Impact on the Effector Functions of Antigen-Specific CAR T Cells
Source: MDPI journal article supplement (doi:10.3390/cancers13122857), 2021-06-08

Figure S1A

Western Blot HLA-G clone 4H84

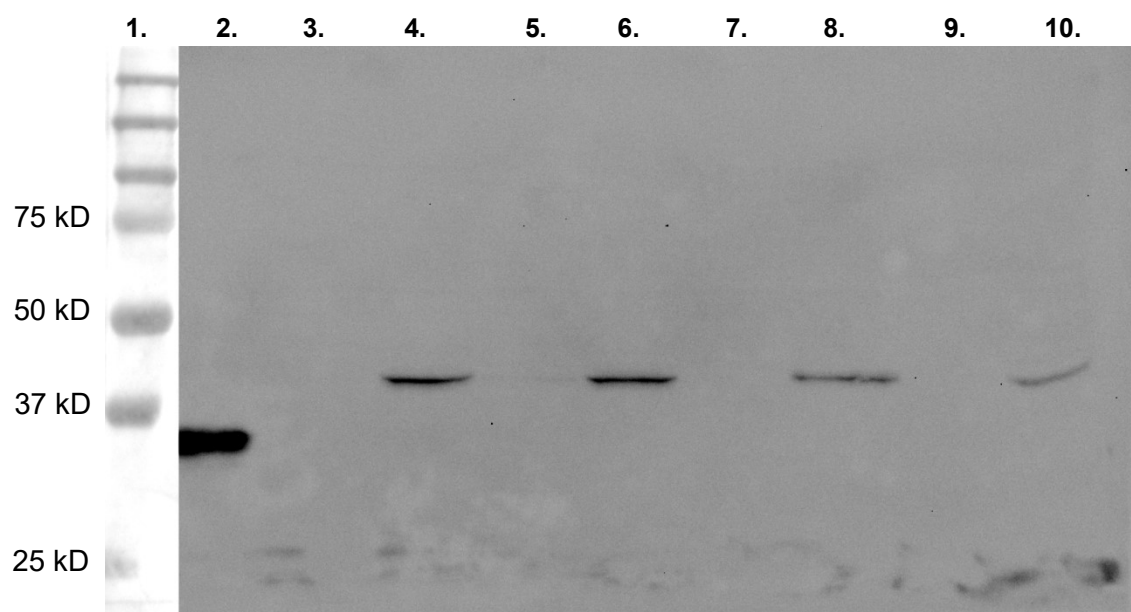

Western Blot  $\beta$ -Actin

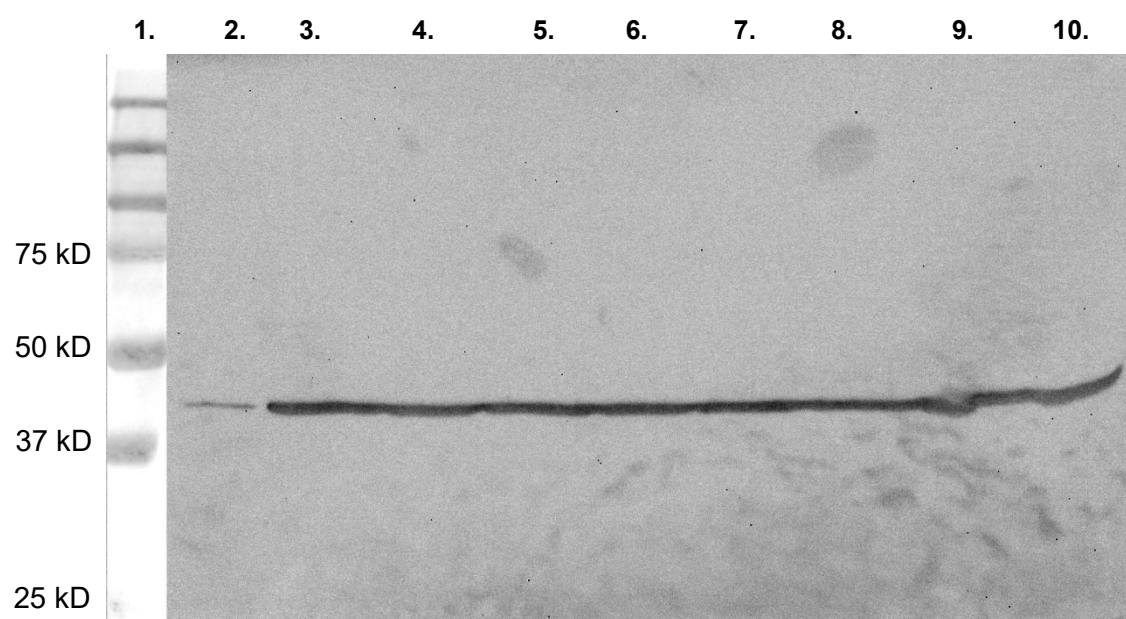

1. Marker
2. K562-HLAG5; 1  $\mu$ g
3. A673 unstimulated; 50  $\mu$ g
4. A673 IFN $\gamma$  2000U 48h; 50  $\mu$ g
5. A4573 unstimulated; 50  $\mu$ g
6. A4573 IFN $\gamma$  2000U 48h; 50  $\mu$ g
7. TC-32 unstimulated; 50  $\mu$ g
8. TC-32 IFN $\gamma$  2000U 48h; 50  $\mu$ g
9. MS-EWS-6 unstimulated; 50  $\mu$ g
10. MS-EWS-6 IFN $\gamma$  2000U 48h; 50  $\mu$ g

Figure S1B

Western Blot HLA-G clone 5A6G7

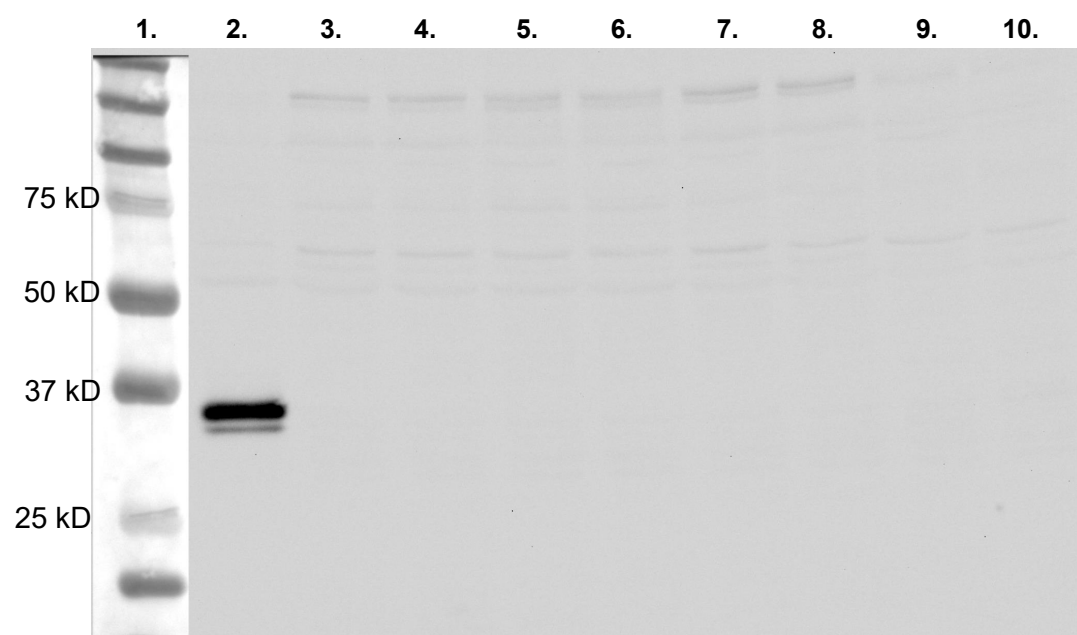

Western Blot  $\beta$ -Actin

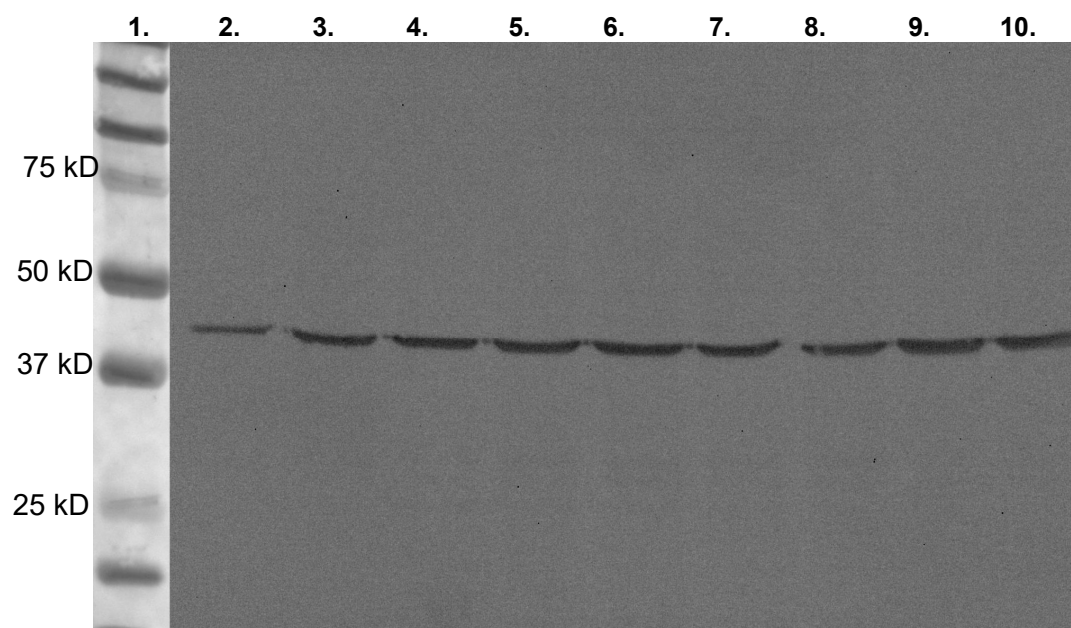

1. Marker
2. K562-HLAG5; 5  $\mu$ g
3. A673 unstimulated; 50  $\mu$ g
4. A673 IFN $\gamma$  2000U 48h; 50  $\mu$ g
5. A4573 unstimulated; 50  $\mu$ g
6. A4573 IFN $\gamma$  2000U 48h; 50  $\mu$ g
7. TC-32 unstimulated; 50  $\mu$ g
8. TC-32 IFN $\gamma$  2000U 48h; 50  $\mu$ g
9. MS-EWS-6 unstimulated; 50  $\mu$ g
10. MS-EWS-6 IFN $\gamma$  2000U 48h; 50  $\mu$ g

Appendix B/B

Western Blot HLA-G clone 4H84

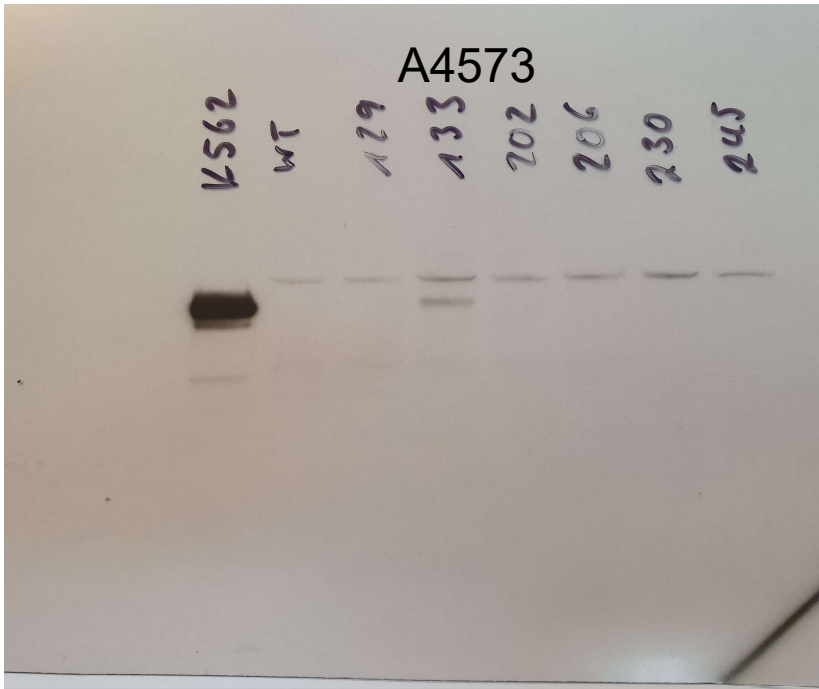

Appendix B/C

Western Blot HLA-G clone 4H84

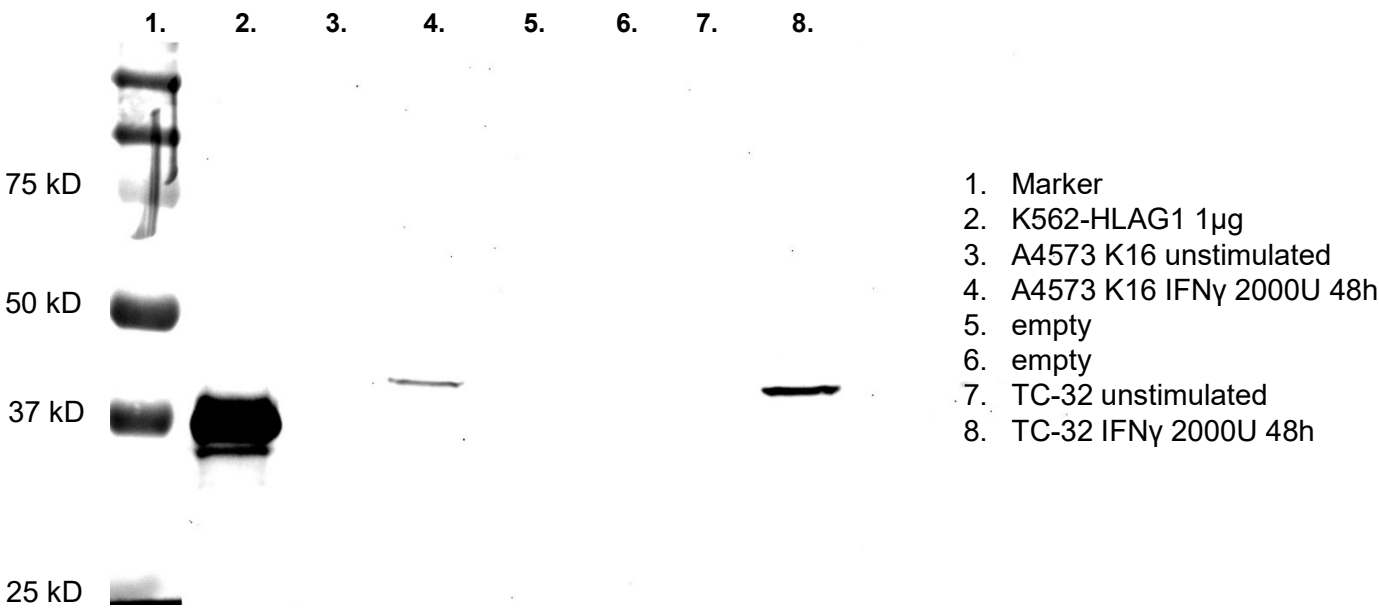

Supplement: s1 [file s1]
